# Supplementary material for: [Retracted] Two Myricetin‐Derived Flavonols from Morella rubra Leaves as Potent α‐Glucosidase Inhibitors and Structure‐Activity Relationship Study by Computational Chemistry
Source: Hindawi journal article supplement (doi:10.1155/2022/9012943), 2022-01-01
Supplement: f1 [file 9012943.f1.pdf]

**Two myricetin-derived flavonols from *Morella rubra* leaves as potent  $\alpha$ -glucosidase inhibitors and structure-activity relationship study by computational chemistry**

Yilong Liu,<sup>1,3</sup> Ruoqi Wang,<sup>1</sup> Chuanhong Ren,<sup>1</sup> Yifeng Pan,<sup>2</sup> Jiajia Li,<sup>1</sup> Xiaoyong Zhao,<sup>1</sup> Changjie Xu,<sup>1,3</sup> Kunsong Chen,<sup>1,3</sup> Xian Li,<sup>1,3,\*</sup> and Zhiwei Gao<sup>2,\*</sup>

<sup>1</sup>Zhejiang Provincial Key Laboratory of Horticultural Plant Integrative Biology, Zhejiang University, Hangzhou 310058, China

<sup>2</sup>Department of Vascular Surgery, the Second Affiliated Hospital of Zhejiang University School of Medicine Hangzhou 310009, China

<sup>3</sup>Shandong (Linyi) Institute of Modern Agriculture, Zhejiang University, Linyi 276000, China

Correspondence should be addressed to Xian Li; [xianli@zju.edu.cn](mailto:xianli@zju.edu.cn) and Zhiwei Gao; [2317157@zju.edu.cn](mailto:2317157@zju.edu.cn)

A

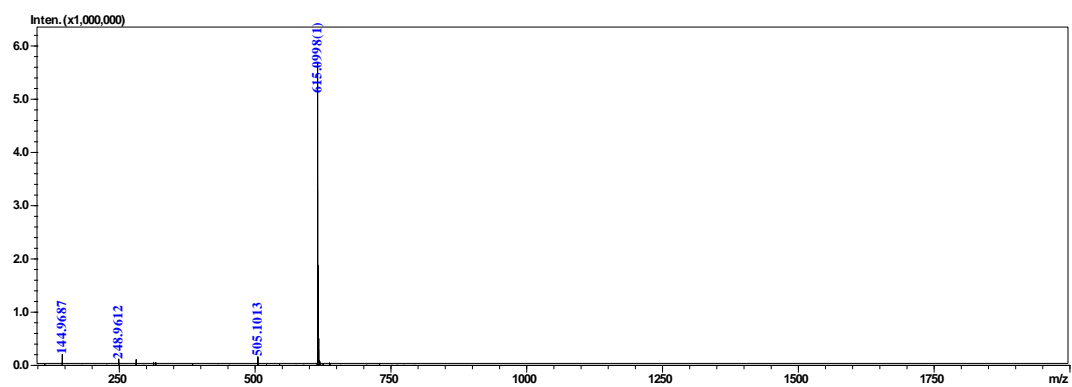

B

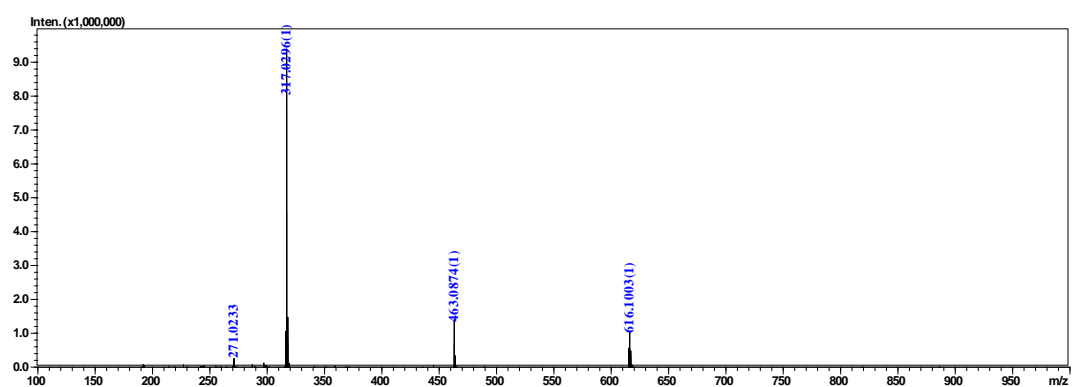

**Supplementary Figure 1.** High-resolution mass identification of purified compound **2**.

A. Primary mass spectrum in negative ion mode; B. MS<sup>2</sup> spectra.

A

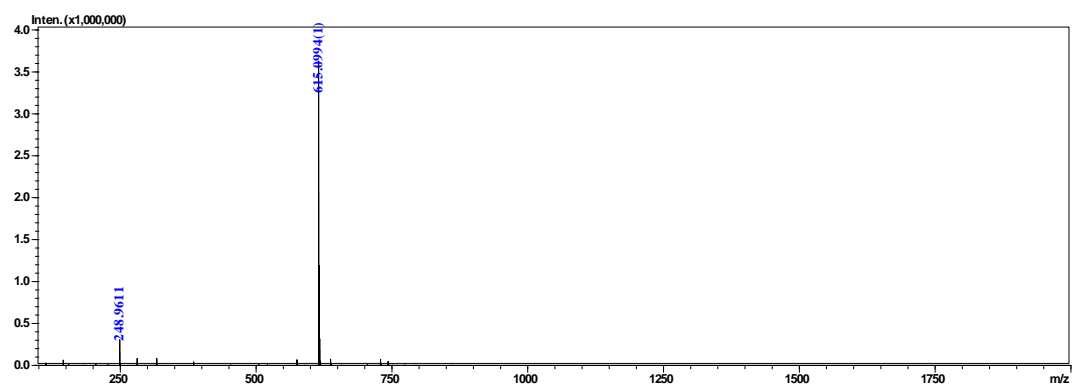

B

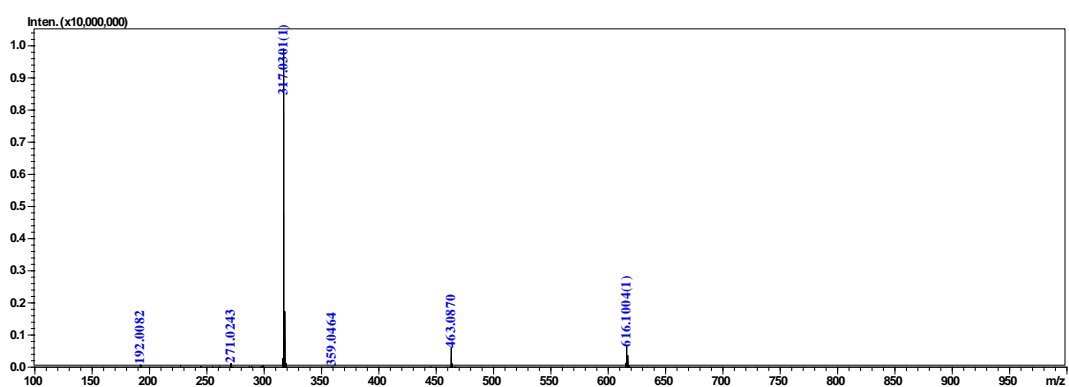

**Supplementary Figure 2.** High-resolution mass identification of purified compound **3**.

A. Primary mass spectrum in negative ion mode; B. MS<sup>2</sup> spectra.

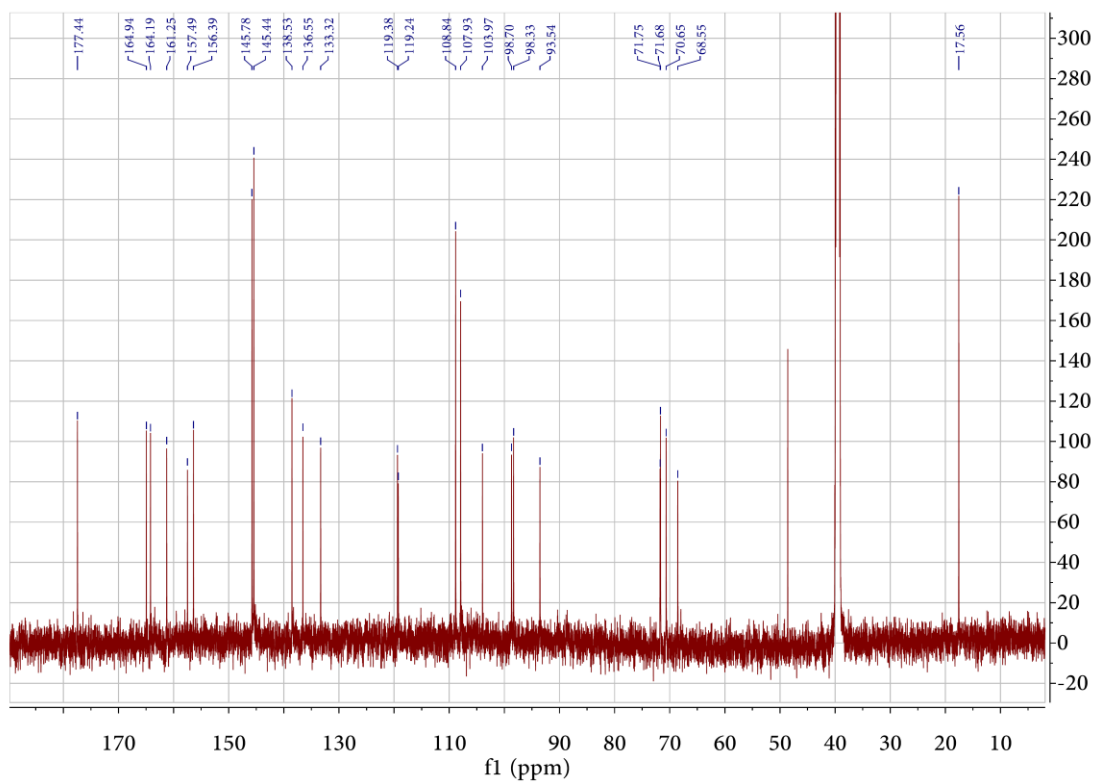

**Supplementary Figure 3.** NMR identification of purified compound 2 in DMSO-*d*<sub>6</sub>.

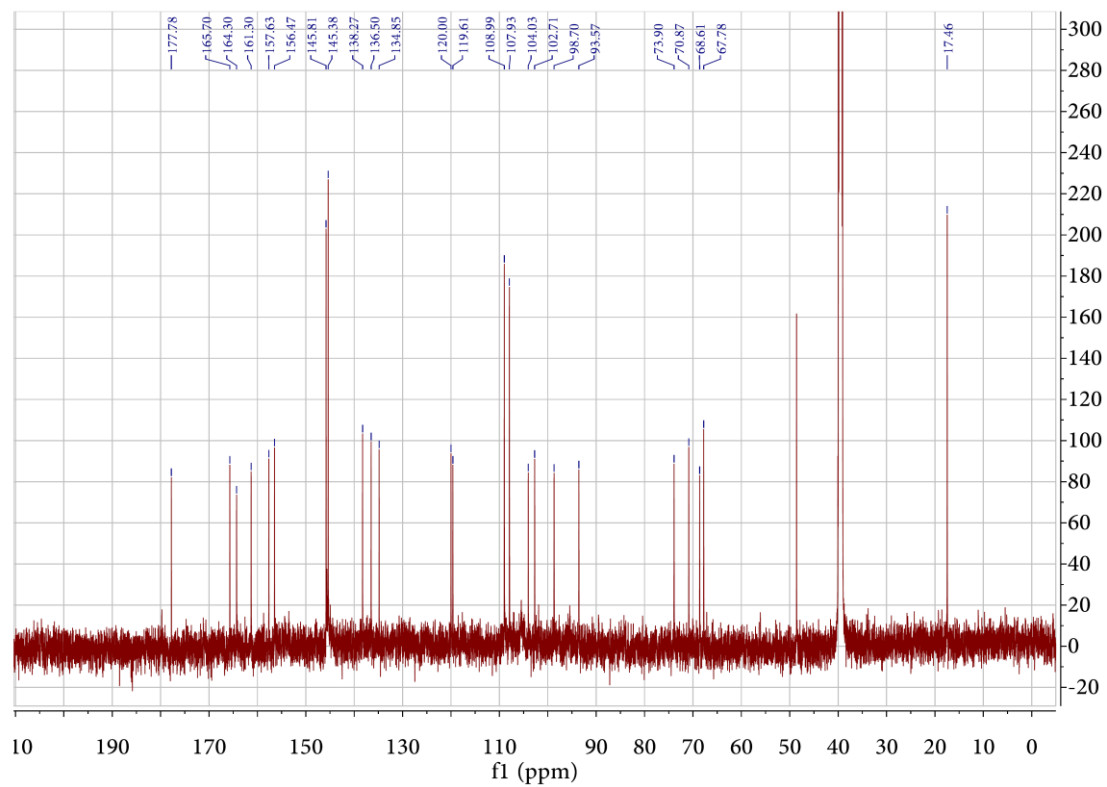

**Supplementary Figure 4.** NMR identification of purified compound **3** in DMSO-*d*<sub>6</sub>.
